# Supplementary material
Source: publisher site journal article supplement (https://www.spandidos-publications.com/8226/downloadSupplementary)
Supplement: Supplementary file 1 [file downloadSupplementary]

## Sheet: Table S5
Table SV. Significance test for correlation between insulin-like growth factor 1 receptor expression and immune infiltration profiles across pan-cancer datasets.
Cancer type	aDC	B cells	CD8 T cells	Cytotoxic cells	DC	Eosinophils	iDC	Macrophages	Mast cells	Neutrophils	NK CD56bright cells	NK CD56dim cells	NK cells	pDC	T cells	T helper cells	Tcm	Tem	TFH	Tgd	Th1 cells	Th17 cells	Th2 cells	TReg
ACC	9.94x10⁻¹	1.24x10⁻²	1.90x10⁻¹	2.79x10⁻²	1.77x10⁻¹	1.65x10⁻¹	6.80x10⁻²	2.018x10⁻¹	2.728x10⁻³	2.632x10⁻¹	2.671x10⁻³	2.018x10⁻¹	2.728x10⁻³	2.632x10⁻¹	2.671x10⁻³	5.057x10⁻²	8.461x10⁻¹	9.902x10⁻¹	5.336x10⁻³	7.930x10⁻¹	0.01294	4.32x10⁻¹	3.06x10⁻²	8.51x10⁻²
BLCA	3.04x10⁻¹	1.49x10⁻²	6.04x10⁻²	5.18x10⁻²	1.15x10⁻³	3.83x10⁻¹	8.69x10⁻¹	1.351x10⁻¹	4.710x10⁻¹	1.902x10⁻¹	9.817x10⁻¹⁰	1.351x10⁻¹	4.710x10⁻¹	1.902x10⁻¹	9.817x10⁻¹⁰	4.053x10⁻²	1.601x10⁻¹⁵	3.775x10⁻²	1.531x10⁻²	4.815x10⁻³	0.02444	6.11x10⁻¹	2.89x10⁻³	8.93x10⁻¹
BRCA	2.42x10⁻⁴³	3.66x10⁻⁴³	7.90x10⁻⁹	1.77x10⁻³⁷	7.01x10⁻⁴²	7.10x10⁻³⁶	1.43x10⁻⁴	1.679x10⁻²⁶	5.504x10⁻⁷	6.928x10⁻¹⁵	2.017x10⁻⁴	1.679x10⁻²⁶	5.504x10⁻⁷	6.928x10⁻¹⁵	2.017x10⁻⁴	2.900x10⁻⁴	6.064x10⁻¹²	2.176x10⁻²	9.256x10⁻¹³	1.673x10⁻³	2.116e-47	1.25x10⁻⁴	2.35x10⁻⁴	7.02x10⁻⁴⁵
CESC	7.65x10⁻³	3.94x10⁻⁸	1.36x10⁻²	5.98x10⁻³	2.47x10⁻³	5.51x10⁻¹	5.82x10⁻²	9.686x10⁻¹	7.209x10⁻¹	6.262x10⁻¹	4.853x10⁻²	9.686x10⁻¹	7.209x10⁻¹	6.262x10⁻¹	4.853x10⁻²	5.614x10⁻¹	2.287x10⁻⁴	7.120x10⁻²	2.482x10⁻⁵	4.719x10⁻³	0.1787	7.90x10⁻¹	2.68x10⁻²	4.68x10⁻²
CHOL	2.05x10⁻¹	2.43x10⁻¹	5.17x10⁻¹	1.21x10⁻¹	9.80x10⁻¹	1.21x10⁻¹	4.11x10⁻¹	3.820x10⁻²	2.001x10⁻¹	1.226x10⁻¹	2.443x10⁻¹	3.820x10⁻²	2.001x10⁻¹	1.226x10⁻¹	2.443x10⁻¹	4.188x10⁻²	2.637x10⁻²	8.353x10⁻²	8.027x10⁻¹	8.402x10⁻¹	0.7767	9.44x10⁻¹	5.50x10⁻¹	9.74x10⁻¹
COAD	2.75x10⁻²	3.52x10⁻¹	3.43x10⁻¹	8.03x10⁻²	8.75x10⁻¹	1.07x10⁻²	3.12x10⁻¹	5.412x10⁻⁴	1.462x10⁻¹	8.648x10⁻¹	1.772x10⁻¹	5.412x10⁻⁴	1.462x10⁻¹	8.648x10⁻¹	1.772x10⁻¹	1.966x10⁻²	2.772x10⁻¹⁷	1.915x10⁻¹⁰	1.672x10⁻²	2.420x10⁻¹	0.4339	1.90x10⁻⁹	4.10x10⁻⁴	7.94x10⁻¹
DLBC	1.31x10⁻¹	2.11x10⁻¹	2.44x10⁻¹	5.38x10⁻¹	4.58x10⁻¹	7.50x10⁻¹	8.46x10⁻²	2.537x10⁻¹	7.706x10⁻¹	1.766x10⁻¹	1.608x10⁻¹	2.537x10⁻¹	7.706x10⁻¹	1.766x10⁻¹	1.608x10⁻¹	2.844x10⁻⁴	1.005x10⁻¹	4.138x10⁻¹	1.735x10⁻¹	3.641x10⁻¹	0.3134	1.96x10⁻¹	4.03x10⁻¹	1.86x10⁻¹
ESCA	4.08x10⁻¹	2.77x10⁻³	2.68x10⁻²	5.55x10⁻¹	4.06x10⁻¹	9.51x10⁻⁵	2.53x10⁻¹	1.527x10⁻²	3.137x10⁻¹	7.809x10⁻¹	7.366x10⁻⁴	1.527x10⁻²	3.137x10⁻¹	7.809x10⁻¹	7.366x10⁻⁴	9.362x10⁻¹	6.026x10⁻⁸	9.904x10⁻²	6.631x10⁻¹	7.375x10⁻³	0.04093	8.54x10⁻¹⁰	8.34x10⁻⁷	4.94x10⁻¹
GBM	6.88x10⁻⁵	5.66x10⁻⁴	2.57x10⁻¹	4.98x10⁻⁶	8.09x10⁻²	5.10x10⁻¹	1.80x10⁻²	1.088x10⁻²	1.384x10⁻²	8.527x10⁻²	4.338x10⁻¹	1.088x10⁻²	1.384x10⁻²	8.527x10⁻²	4.338x10⁻¹	6.726x10⁻³	4.903x10⁻⁹	8.751x10⁻⁶	4.950x10⁻²	1.769x10⁻²	0.5703	2.18x10⁻¹	1.89x10⁻¹	6.08x10⁻¹
HNSC	3.12x10⁻⁶	7.24x10⁻⁵	5.85x10⁻⁵	5.11x10⁻¹¹	5.42x10⁻⁴	4.51x10⁻⁸	8.01x10⁻¹	1.373x10⁻²	1.484x10⁻¹	7.516x10⁻¹	8.794x10⁻¹	1.373x10⁻²	1.484x10⁻¹	7.516x10⁻¹	8.794x10⁻¹	2.232x10⁻¹	1.148x10⁻¹⁰	1.272x10⁻⁵	7.548x10⁻¹	2.747x10⁻¹	0.2304	9.41x10⁻³	1.04x10⁻⁶	2.32x10⁻¹
KICH	5.01x10⁻¹	6.06x10⁻²	7.72x10⁻¹	5.25x10⁻²	2.04x10⁻²	9.76x10⁻¹	5.53x10⁻⁴	1.833x10⁻¹	7.452x10⁻¹	2.314x10⁻¹	1.860x10⁻¹	1.833x10⁻¹	7.452x10⁻¹	2.314x10⁻¹	1.860x10⁻¹	2.594x10⁻¹	2.502x10⁻⁴	3.174x10⁻¹	9.209x10⁻¹	7.253x10⁻¹	0.02337	4.05x10⁻²	4.21x10⁻¹	2.14x10⁻²
KIRC	4.21x10⁻¹⁰	5.30x10⁻⁶	3.88x10⁻³	1.06x10⁻¹⁶	1.89x10⁻¹	2.85x10⁻⁵	9.45x10⁻²	6.633x10⁻¹	3.631x10⁻¹⁰	7.393x10⁻⁷	0	6.633x10⁻¹	3.631x10⁻¹⁰	7.393x10⁻⁷	0	8.887x10⁻³	1.568x10⁻¹⁶	2.883x10⁻⁵	2.095x10⁻⁶	2.292x10⁻²	3.13e-06	4.67x10⁻¹⁸	2.35x10⁻⁴	1.85x10⁻²⁰
KIRP	5.40x10⁻³	6.41x10⁻⁶	5.43x10⁻³	1.59x10⁻¹⁰	9.18x10⁻⁵	1.64x10⁻²	4.52x10⁻⁴	6.794x10⁻³	2.955x10⁻¹	8.541x10⁻⁵	3.705x10⁻⁹	6.794x10⁻³	2.955x10⁻¹	8.541x10⁻⁵	3.705x10⁻⁹	1.645x10⁻¹⁰	0.000x10⁰	2.316x10⁻²	3.793x10⁻³	6.430x10⁻¹	0.4019	8.04x10⁻¹	4.23x10⁻¹	1.36x10⁻³
LAML	5.36x10⁻¹	5.64x10⁻¹	1.45x10⁻³	1.06x10⁻¹	8.60x10⁻⁴	4.24x10⁻¹	4.74x10⁻³	2.366x10⁻⁴	6.717x10⁻⁴	4.612x10⁻³	9.852x10⁻²	2.366x10⁻⁴	6.717x10⁻⁴	4.612x10⁻³	9.852x10⁻²	3.918x10⁻⁵	1.056x10⁻³	4.692x10⁻²	2.097x10⁻²	2.507x10⁻²	0.2664	1.25x10⁻¹	1.71x10⁻¹	8.33x10⁻¹
LGG	9.01x10⁻⁴	2.70x10⁻³	1.71x10⁻³	4.24x10⁻⁹	1.23x10⁻¹	9.12x10⁻⁸	4.03x10⁻⁸	1.237x10⁻⁷	7.572x10⁻⁷	1.463x10⁻⁴	4.482x10⁻⁵	1.237x10⁻⁷	7.572x10⁻⁷	1.463x10⁻⁴	4.482x10⁻⁵	7.492x10⁻¹²	2.908x10⁻¹⁷	3.770x10⁻²	6.043x10⁻²	1.593x10⁻¹⁵	0.002359	6.66x10⁻⁶	5.98x10⁻¹	2.22x10⁻²
LIHC	2.91x10⁻¹	1.17x10⁻²	2.83x10⁻⁴	6.49x10⁻¹	6.76x10⁻¹	6.64x10⁻¹	8.09x10⁻¹⁰	2.009x10⁻¹⁷	1.176x10⁻⁷	5.216x10⁻²	1.793x10⁻⁶	2.009x10⁻¹⁷	1.176x10⁻⁷	5.216x10⁻²	1.793x10⁻⁶	1.658x10⁻¹²	1.132x10⁻³	3.138x10⁻²⁷	1.888x10⁻⁷	6.366x10⁻¹	5.743e-07	4.31x10⁻¹²	6.36x10⁻³	4.85x10⁻¹
LUAD	3.51x10⁻⁹	5.88x10⁻⁸	2.06x10⁻³	1.63x10⁻⁹	7.55x10⁻⁵	3.81x10⁻¹	1.19x10⁻⁵	1.181x10⁻⁵	5.165x10⁻¹	3.130x10⁻¹	2.242x10⁻¹	1.181x10⁻⁵	5.165x10⁻¹	3.130x10⁻¹	2.242x10⁻¹	1.569x10⁻¹	2.994x10⁻⁸	3.818x10⁻¹	1.365x10⁻⁴	2.090x10⁻¹	2.062e-10	8.07x10⁻¹	3.66x10⁻¹	8.38x10⁻⁸
LUSC	2.93x10⁻¹⁰	1.62x10⁻¹⁰	5.52x10⁻⁷	2.39x10⁻¹¹	2.06x10⁻⁴	1.27x10⁻²	9.98x10⁻⁴	3.076x10⁻³	6.250x10⁻¹	7.554x10⁻⁶	5.721x10⁻¹	3.076x10⁻³	6.250x10⁻¹	7.554x10⁻⁶	5.721x10⁻¹	4.632x10⁻⁵	7.097x10⁻⁵	6.758x10⁻¹	8.469x10⁻²	7.756x10⁻¹	7.981e-08	8.82x10⁻²	4.68x10⁻²	2.51x10⁻⁶
MESO	1.78x10⁻³	1.30x10⁻²	2.67x10⁻¹	1.24x10⁻⁴	6.11x10⁻⁴	6.92x10⁻¹	1.30x10⁻²	9.434x10⁻²	7.005x10⁻²	8.533x10⁻²	6.251x10⁻¹	9.434x10⁻²	7.005x10⁻²	8.533x10⁻²	6.251x10⁻¹	2.073x10⁻¹	5.476x10⁻¹	7.103x10⁻¹	9.603x10⁻¹	5.975x10⁻¹	0.02638	5.12x10⁻²	1.10x10⁻²	1.39x10⁻²
OV	1.35x10⁻⁷	3.32x10⁻⁵	1.08x10⁻¹	6.18x10⁻⁹	6.80x10⁻²	1.89x10⁻⁴	4.16x10⁻²	5.170x10⁻³	1.460x10⁻⁵	6.887x10⁻³	1.964x10⁻¹	5.170x10⁻³	1.460x10⁻⁵	6.887x10⁻³	1.964x10⁻¹	5.175x10⁻¹	0.000x10⁰	2.344x10⁻²	1.061x10⁻²	1.046x10⁻¹	1.937e-07	1.82x10⁻¹	1.08x10⁻⁵	6.03x10⁻⁵
PAAD	9.25x10⁻¹	1.35x10⁻¹	7.73x10⁻¹	2.93x10⁻¹	6.20x10⁻²	3.50x10⁻¹	7.45x10⁻²	3.579x10⁻³	1.244x10⁻⁴	3.483x10⁻³	8.650x10⁻¹	3.579x10⁻³	1.244x10⁻⁴	3.483x10⁻³	8.650x10⁻¹	1.245x10⁻⁴	3.139x10⁻⁴	6.463x10⁻³	1.314x10⁻¹	2.142x10⁻²	0.001001	1.07x10⁻⁴	1.25x10⁻¹	6.38x10⁻²
PCPG	2.76x10⁻¹	4.89x10⁻¹	8.84x10⁻¹	4.07x10⁻¹	3.94x10⁻²	1.34x10⁻⁵	1.95x10⁻¹	6.083x10⁻¹	1.715x10⁻¹	6.319x10⁻¹	1.279x10⁻¹	6.083x10⁻¹	1.715x10⁻¹	6.319x10⁻¹	1.279x10⁻¹	3.390x10⁻¹	1.389x10⁻⁸	3.373x10⁻¹	1.487x10⁻¹	1.666x10⁻¹⁰	0.4408	1.77x10⁻¹	1.82x10⁻²	1.57x10⁻⁵
PRAD	9.80x10⁻³	3.04x10⁻³	2.90x10⁻¹	5.98x10⁻⁹	9.88x10⁻⁸	7.68x10⁻³	2.55x10⁻³	2.669x10⁻³	1.843x10⁻¹	7.105x10⁻¹	5.845x10⁻¹³	2.669x10⁻³	1.843x10⁻¹	7.105x10⁻¹	5.845x10⁻¹³	1.356x10⁻⁹	0.000x10⁰	3.387x10⁻³	6.706x10⁻²	3.640x10⁻²	4.519e-05	6.79x10⁻⁸	9.89x10⁻¹	2.12x10⁻⁴
READ	5.04x10⁻¹	4.26x10⁻¹	9.87x10⁻¹	1.04x10⁻¹	6.73x10⁻¹	8.96x10⁻¹	7.20x10⁻¹	1.285x10⁻²	3.761x10⁻¹	2.471x10⁻¹	1.726x10⁻²	1.285x10⁻²	3.761x10⁻¹	2.471x10⁻¹	1.726x10⁻²	2.575x10⁻³	4.161x10⁻⁶	2.298x10⁻³	1.153x10⁻¹	2.624x10⁻¹	0.3967	4.50x10⁻⁴	8.26x10⁻¹	1.62x10⁻¹
SARC	1.23x10⁻⁸	8.55x10⁻⁴	1.02x10⁻⁶	6.14x10⁻⁷	1.04x10⁻⁹	2.21x10⁻³	3.71x10⁻⁷	6.615x10⁻⁹	2.467x10⁻¹	6.576x10⁻¹²	3.881x10⁻⁴	6.615x10⁻⁹	2.467x10⁻¹	6.576x10⁻¹²	3.881x10⁻⁴	5.101x10⁻¹	6.751x10⁻¹	4.205x10⁻¹	2.098x10⁻⁹	6.877x10⁻⁴	9.014e-09	3.11x10⁻⁶	9.94x10⁻¹	1.66x10⁻⁸
SKCM	1.68x10⁻⁷	5.88x10⁻³	4.45x10⁻²	1.82x10⁻⁸	6.00x10⁻⁹	4.51x10⁻¹	1.06x10⁻⁵	1.894x10⁻⁵	6.676x10⁻⁵	1.152x10⁻⁶	1.990x10⁻⁶	1.894x10⁻⁵	6.676x10⁻⁵	1.152x10⁻⁶	1.990x10⁻⁶	5.737x10⁻¹	2.621x10⁻³	8.101x10⁻¹	2.242x10⁻²	5.239x10⁻²	3.874e-06	1.01x10⁻¹	1.16x10⁻¹	6.92x10⁻¹⁰
STAD	2.08x10⁻¹	9.36x10⁻¹	6.68x10⁻¹	8.27x10⁻¹	1.57x10⁻¹	9.69x10⁻²	3.42x10⁻¹	3.091x10⁻²	5.712x10⁻³	4.632x10⁻¹	5.527x10⁻²	3.091x10⁻²	5.712x10⁻³	4.632x10⁻¹	5.527x10⁻²	6.775x10⁻²	1.693x10⁻¹³	1.076x10⁻⁹	1.487x10⁻¹	3.549x10⁻¹	0.4741	2.91x10⁻⁶	1.33x10⁻¹	3.95x10⁻¹
TGCT	1.78x10⁻²	2.35x10⁻²	1.91x10⁻³	2.61x10⁻⁴	7.45x10⁻⁸	2.00x10⁻¹	1.43x10⁻⁸	4.270x10⁻⁶	3.117x10⁻³	3.799x10⁻⁴	4.087x10⁻⁷	4.270x10⁻⁶	3.117x10⁻³	3.799x10⁻⁴	4.087x10⁻⁷	1.549x10⁻⁴	0.000x10⁰	5.083x10⁻⁴	5.615x10⁻¹	3.032x10⁻²	2.051e-06	3.95x10⁻¹	7.75x10⁻⁵	2.11x10⁻³
THCA	1.10x10⁻²	4.01x10⁻⁷	1.27x10⁻¹	5.81x10⁻¹¹	3.01x10⁻¹	9.25x10⁻¹⁷	5.30x10⁻¹	5.696x10⁻¹	1.468x10⁻¹	2.129x10⁻¹	3.406x10⁻⁵	5.696x10⁻¹	1.468x10⁻¹	2.129x10⁻¹	3.406x10⁻⁵	1.082x10⁻⁸	3.000x10⁻¹⁴	3.237x10⁻¹	6.129x10⁻⁹	9.560x10⁻²	0.9661	6.85x10⁻²	3.88x10⁻¹	2.18x10⁻³
THYM	6.33x10⁻¹	1.52x10⁻⁸	2.08x10⁻³	5.99x10⁻²	2.22x10⁻⁷	9.70x10⁻⁴	4.53x10⁻¹	5.424x10⁻⁷	2.062x10⁻²	6.725x10⁻²	9.333x10⁻²	5.424x10⁻⁷	2.062x10⁻²	6.725x10⁻²	9.333x10⁻²	7.985x10⁻¹	1.008x10⁻¹	4.336x10⁻³	1.107x10⁻⁸	1.267x10⁻⁴	0.7501	0.00x10⁰	1.04x10⁻²	8.32x10⁻¹
UCEC	9.29x10⁻⁴	3.21x10⁻⁵	2.24x10⁻³	8.41x10⁻⁹	3.36x10⁻⁹	3.14x10⁻⁶	2.96x10⁻¹	6.812x10⁻¹	2.527x10⁻¹	4.250x10⁻¹	2.248x10⁻¹	6.812x10⁻¹	2.527x10⁻¹	4.250x10⁻¹	2.248x10⁻¹	6.953x10⁻¹	7.289x10⁻¹²	4.383x10⁻¹	3.623x10⁻²	9.299x10⁻¹	0.002755	1.79x10⁻²	2.40x10⁻⁷	3.38x10⁻⁶
UCS	9.18x10⁻²	3.56x10⁻¹	8.70x10⁻²	1.71x10⁻²	1.32x10⁻¹	3.24x10⁻¹	7.82x10⁻³	3.141x10⁻¹	2.558x10⁻³	1.493x10⁻²	7.416x10⁻¹	3.141x10⁻¹	2.558x10⁻³	1.493x10⁻²	7.416x10⁻¹	2.577x10⁻²	2.200x10⁻¹	4.693x10⁻¹	4.006x10⁻¹	3.160x10⁻¹	0.06888	1.43x10⁻²	3.13x10⁻¹	7.60x10⁻¹
UVM	8.87x10⁻¹	1.63x10⁻¹	6.66x10⁻³	2.21x10⁻¹	1.09x10⁻²	1.35x10⁻¹	3.06x10⁻²	4.387x10⁻¹	5.760x10⁻⁴	3.330x10⁻³	1.787x10⁻⁵	4.387x10⁻¹	5.760x10⁻⁴	3.330x10⁻³	1.787x10⁻⁵	3.494x10⁻⁸	8.831x10⁻⁸	2.406x10⁻¹	7.714x10⁻¹	7.576x10⁻¹	0.6701	1.43x10⁻²	7.38x10⁻²	5.20x10⁻²
ACC, adrenocortical carcinoma; BLCA, bladder urothelial carcinoma; BRCA, breast invasive carcinoma; CESC, cervical squamous cell carcinoma and endocervical adenocarcinoma; CHOL, cholangiocarcinoma; COAD, colon adenocarcinoma; DLBC, lymphoid neoplasm diffuse large B-cell lymphoma; ESCA, esophageal carcinoma; GBM, glioblastoma multiforme; HNSC, head and neck squamous cell carcinoma; KICH, kidney ch…
